# Supplementary material for: Cryo-electron tomography structure of Arp2/3 complex in cells reveals new insights into the branch junction
Source: PubMed Central journal article supplement (PMC7755917; doi:10.1038/s41467-020-20286-x), 2020-12-22
Supplement: 41467_2020_20286_MOESM1_ESM.pdf [file 41467_2020_20286_MOESM1_ESM.pdf]

## Supplementary Information

### **Cryo-electron tomography structure of Arp2/3 complex in cells reveals new insights into the branch junction**

Florian Fäßler<sup>1</sup>, Georgi Dimchev<sup>1</sup>, Victor-Valentin Hodirnau<sup>1</sup>, William Wan<sup>2</sup>, Florian KM Schur<sup>1\*</sup>

#### **Affiliations:**

<sup>1</sup> Institute of Science and Technology (IST) Austria, Klosterneuburg, Austria

<sup>2</sup> Department of Biochemistry and Center for Structural Biology, Vanderbilt University, Nashville, United States of America

**\*Correspondence to:** [florian.schur@ist.ac.at](mailto:florian.schur@ist.ac.at)

**Keywords:** Arp2/3 complex, actin cytoskeleton, cryo-electron tomography, image processing, structural biology

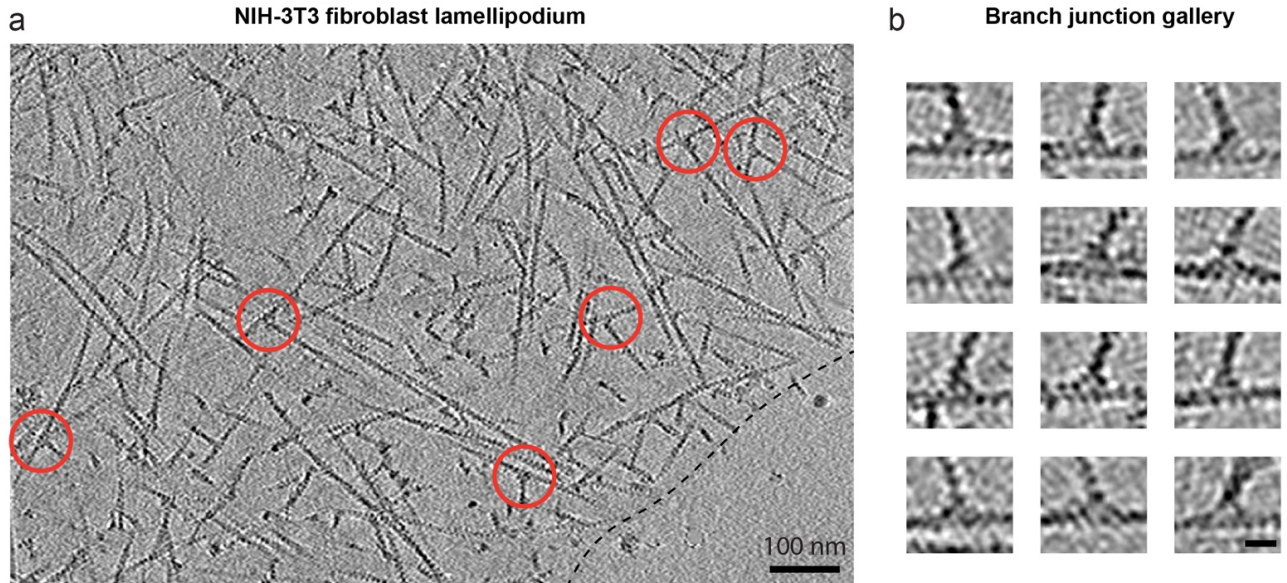

**Supplementary Fig. 1.: Cryo-ET of the actin network in a NIH-3T3 fibroblast lamellipodium. (a)** Computational slice through a binned, non-CTF corrected tomogram (17.096Å/px) of a NIH-3T3 fibroblast lamellipodium. Protein density is black. The dense actin network is visible and the helical appearance of individual actin filaments can be clearly appreciated. Several branch junctions are highlighted in red circles. The dashed line indicates the cell edge. Scale bar is 100nm. This slice is representative for 131 tomograms, obtained from 3 independent data acquisitions, as explained in the Methods. **(b)** Gallery of selected branch junctions. The density corresponding to the Arp2/3 complex at branch junctions is visible in the individual examples. Scale bar is 20 nm. The branch junctions in this gallery are representative for in total 14,296 branch junctions, obtained from the entire dataset of 131 tomograms.

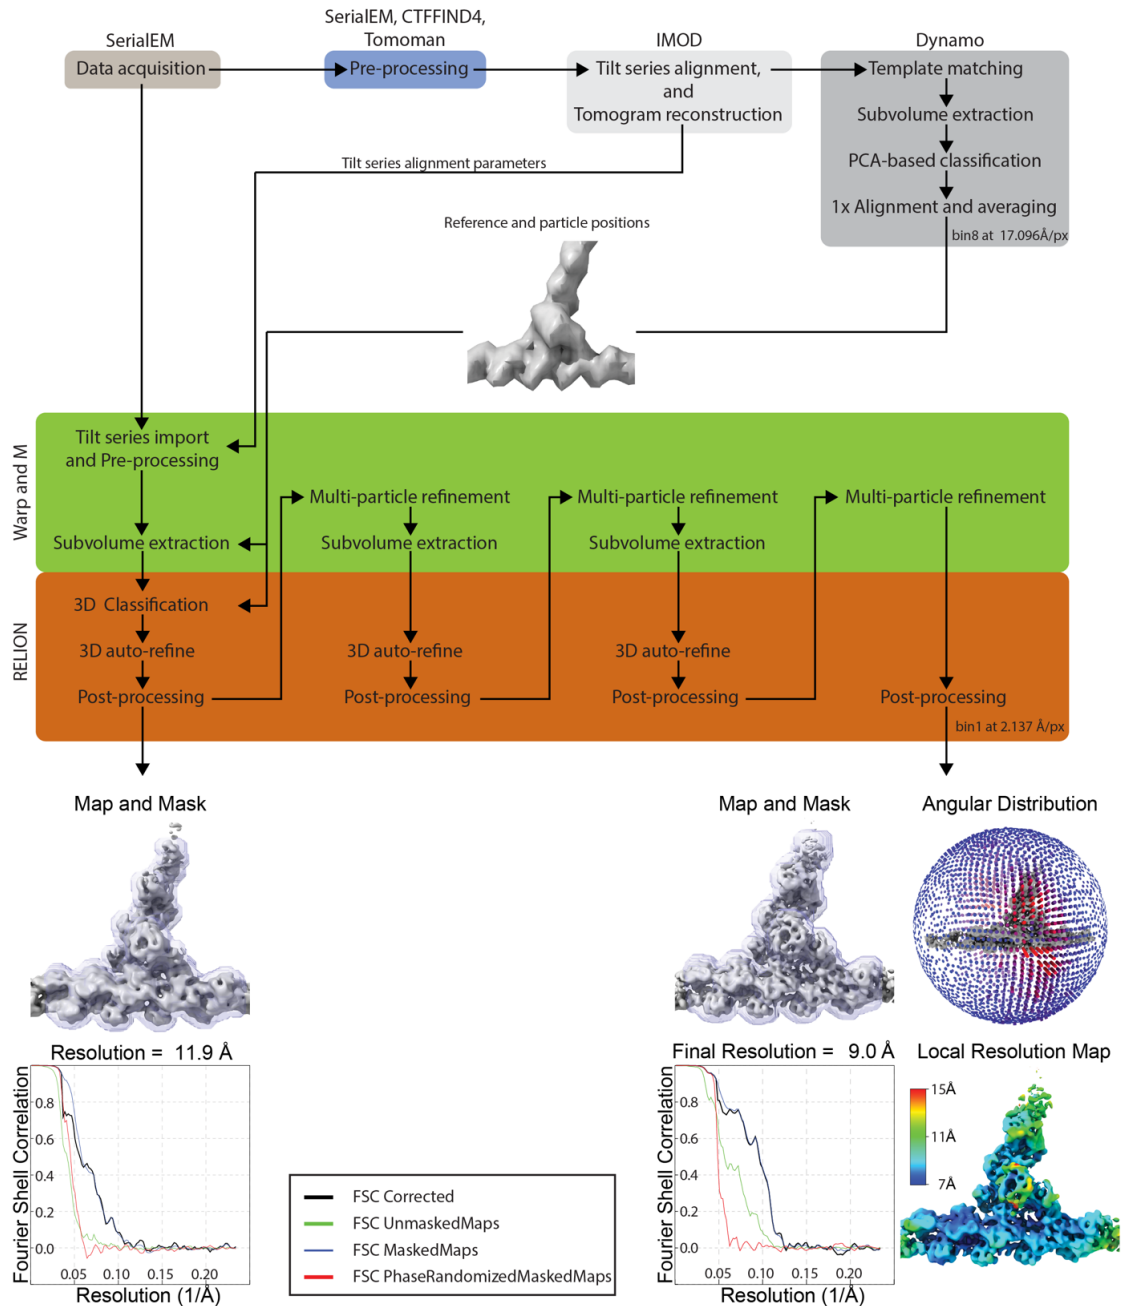

**Supplementary Fig. 2.: Graphical workflow of image processing.** Flow chart indicating the data processing steps involved in generating the structure of the active Arp2/3 complex within the branch junction. Colored boxes indicate usage of specific software packages. For simplicity, the procedure to produce a reference for template matching via manual picking and averaging branch junctions is not depicted here, but is described within the Methods section. In the angular distribution map less common orientations are depicted in blue while more common orientations are depicted in red. The local resolution map is colored according to the provided color key.

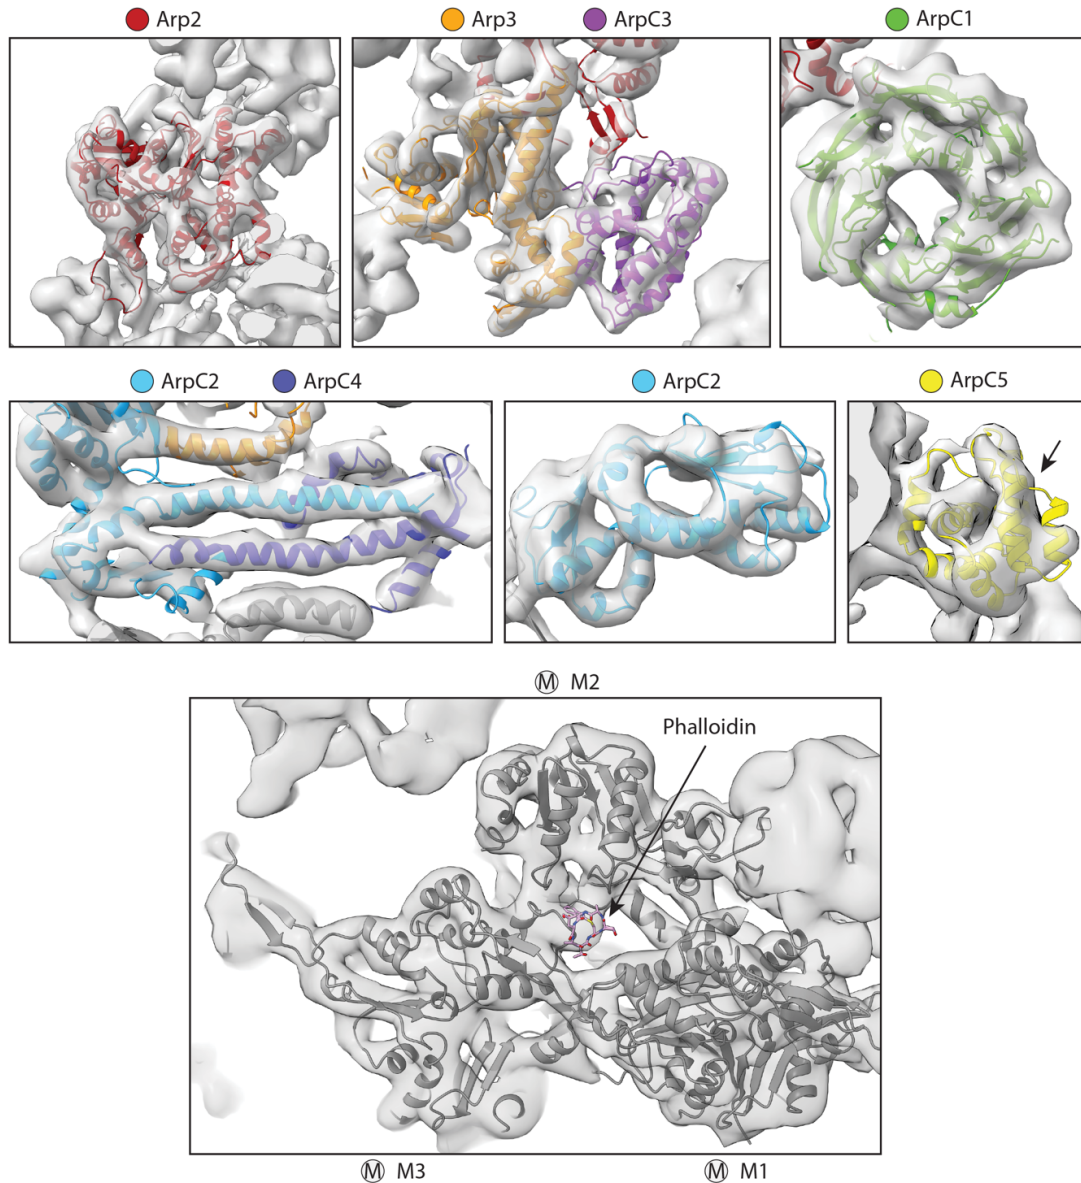

**Supplementary Fig. 3.: Structural details of the actin filament Arp2/3 complex branch junction.** Densities for the individual subunits of the Arp2/3 complex and the mother filament (M#) plus their fitted models are shown. Secondary structure detail (i.e. alpha helices) are clearly visualized, for example for Arp3, ArpC2 and ArpC4. The beta-propellers of ArpC1 allow unambiguous fitting of the subunit into the density of the branch junction. The increased apparent flexibility at the N-terminus of the ArpC5 helical core (annotated by an arrow) is visible, resulting in reduced density for the N-terminal helices of this subunit. The subnanometer resolution of our structure also allows to clearly visualize secondary structure details in the actin filament, further highlighted by the visibility of an additional density accommodating phalloidin (annotated by an arrow). Subunit colors are annotated and identical to the schematic guide given in Figure 1 with Arp2 being red, Arp3 orange, ArpC1 green, ArpC2 light blue, ArpC3 violet, ArpC4 dark blue and ArpC5 yellow. Actin is shown in grey.

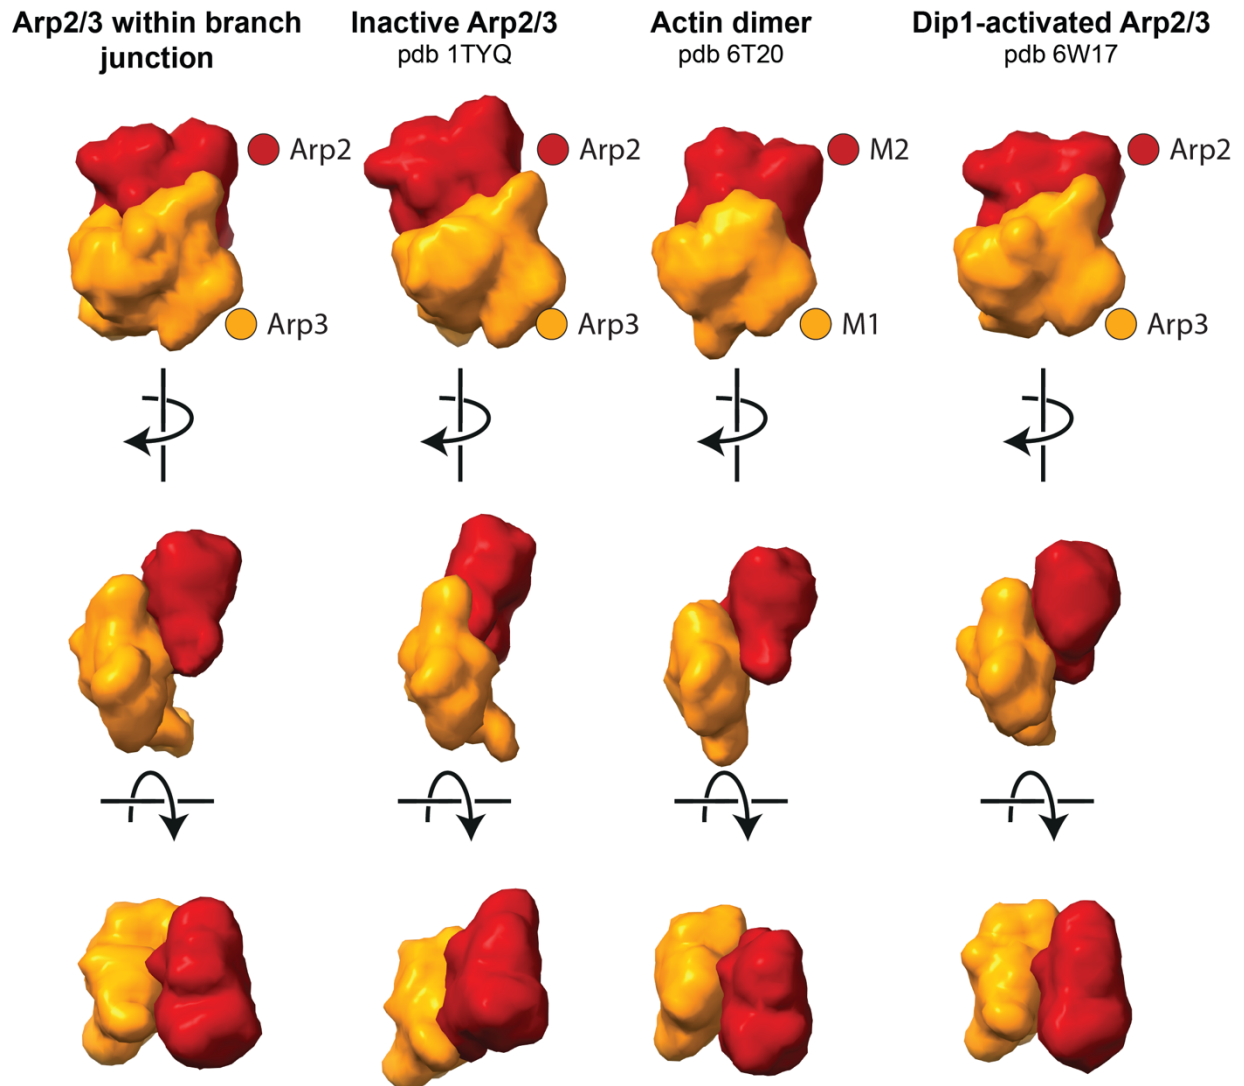

**Supplementary Fig. 4.: Comparison of the short pitch actin dimer conformation to Arp2 and Arp3 in their inactive and active conformation.** Density maps of molecular models of an actin dimer, or of Arp2 and Arp3 in their active and inactive conformation, respectively, filtered to a resolution of 15Å. The model of the active Arp2/3 conformation was derived from our model of the actin filament Arp2/3 complex branch junction structure in cells described in this manuscript and the *in vitro* Dip1-activated *S. pombe* Arp2/3 complex (pdb 6W17)<sup>1</sup>. The shown models of filamentous actin were derived from pdb 6T20<sup>2</sup>, and for the inactive ATP-bound Arp2/3 complex from pdb 1TYQ<sup>3</sup>. Maps were oriented by fitting Arp3 subunits and the actin subunit M1 to each other. While Arp2 and Arp3 of the active complex adopt a similar short pitch conformation as the actin dimer, this is not the case for the Arp2 and Arp3 subunits of the inactive complex. Subunit identity is indicated by the color scheme. Arp2 and the corresponding actin subunit are shown in red and Arp3 and the corresponding subunit are shown in orange.

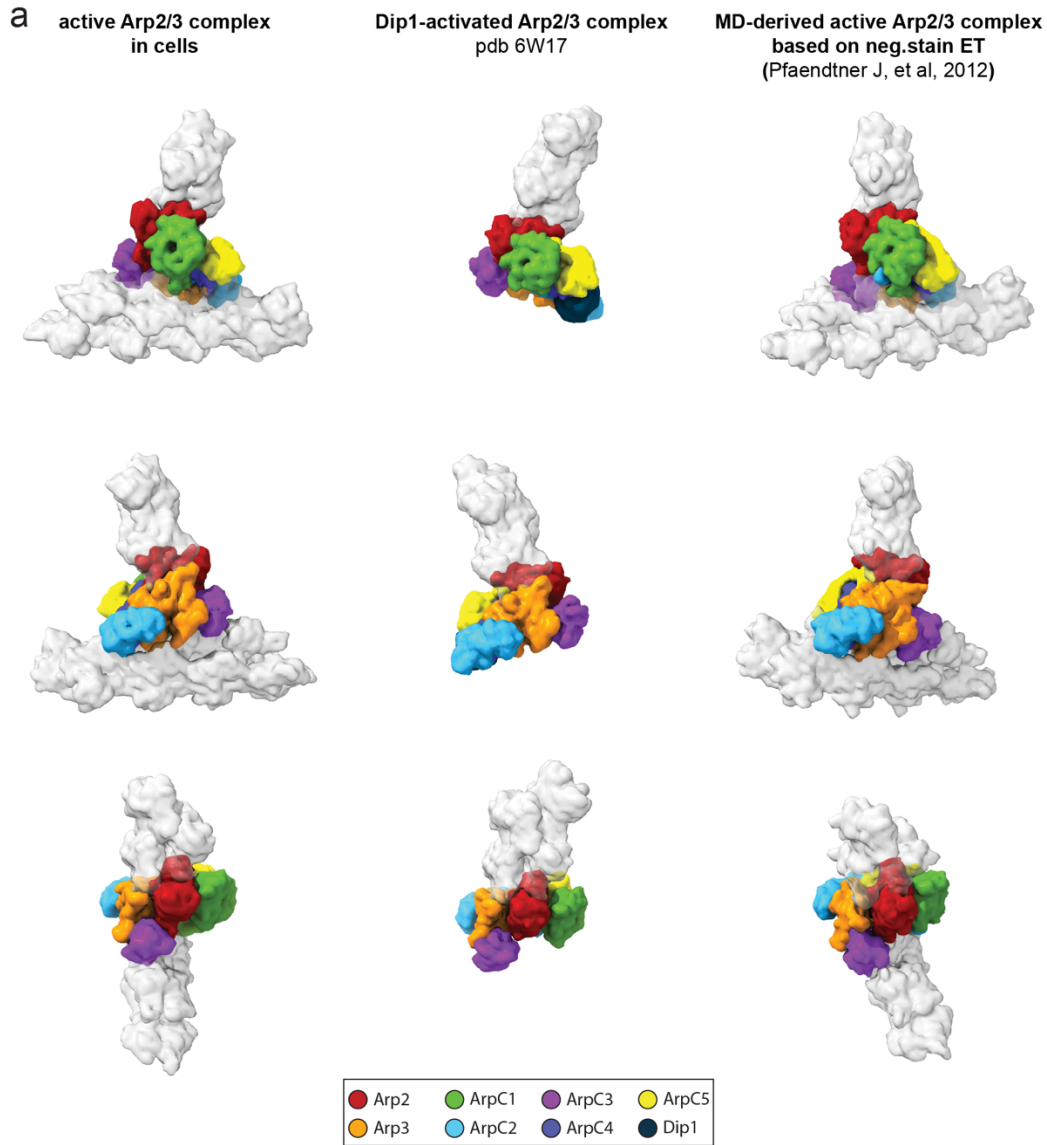

**b** C-alpha RMSD (Å) between subunits in active Arp2/3 complex in cells (this study) and Dip1-activated Arp2/3 complex (pdb 6W17)

| subunit used for alignment | Arp2 | ArpC1 | ArpC4 | ArpC5 | Arp3 | ArpC2 | ArpC3 |
|----------------------------|------|-------|-------|-------|------|-------|-------|
| Arp2                       | 2.4  | 5.7   | 4.6   | 6.8   | 4.7  | 5.6   | 6.8   |
| ArpC1                      | 5.8  | 4.1   | 5.1   | 4.0   | 9.8  | 10.2  | 15.6  |
| ArpC4                      | 6.4  | 5.3   | 2.3   | 3.9   | 8.1  | 4.9   | 15.9  |
| ArpC5                      | 8.1  | 6.5   | 4.3   | 2.1   | 10.5 | 10.2  | 11.8  |
| Arp3                       | 5.8  | 7.7   | 5.5   | 4.8   | 2.6  | 3.6   | 7.5   |
| ArpC2                      | 4.9  | 6.7   | 4.3   | 3.7   | 4.0  | 2.1   | 11.7  |
| ArpC3                      | 8.5  | 18.3  | 16.8  | 22.3  | 7.1  | 17.1  | 4.1   |

**c** C-alpha RMSD (Å) between subunits in active Arp2/3 complex in cells (this study) and MD-derived active conformation based on neg.stain ET

| subunit used for alignment | Arp2 | ArpC1 | ArpC4 | ArpC5 | Arp3 | ArpC2 | ArpC3 |
|----------------------------|------|-------|-------|-------|------|-------|-------|
| Arp2                       | 3.9  | 7.9   | 8.4   | 13.4  | 7.3  | 9.1   | 10.1  |
| ArpC1                      | 13.0 | 5.1   | 3.9   | 4.7   | 11.7 | 6.8   | 26.2  |
| ArpC4                      | 12.8 | 5.4   | 3.3   | 4.5   | 14.5 | 6.8   | 29.2  |
| ArpC5                      | 9.6  | 8.3   | 4.9   | 1.8   | 10.5 | 5.0   | 22.5  |
| Arp3                       | 6.8  | 10.1  | 9.9   | 17.6  | 6.5  | 8.8   | 7.4   |
| ArpC2                      | 11.1 | 8.1   | 5.3   | 6.5   | 10.8 | 3.0   | 23.4  |
| ArpC3                      | 27.1 | 35.9  | 32.4  | 51.3  | 14.3 | 21.8  | 3.2   |
| MF                         | 18.0 | 22.4  | 14.1  | 28.3  | 12.0 | 15.0  | 12.9  |

**Supplementary Fig. 5.: Comparison of the active Arp2/3 complex conformation in branch junctions in cells to the *in vitro* Dip1-activated Arp2/3 complex and to a previously published MD-derived *in vitro* branch junction model. (a) Molecular models of the Arp2/3 complex in the active conformation (shown as density maps filtered to 9.5Å resolution) as observed in cells (left, this study), the *in vitro* Dip1-activated Arp2/3 complex (middle)<sup>1</sup>, and a MD-derived active Arp2/3**

complex (right)<sup>4</sup>, which is based on a low-resolution negative stain ET reconstruction<sup>5</sup>. Subunit colors are annotated and identical to the schematic guide given in Figure 1, with Arp2 being red, Arp3 orange, ArpC1 green, ArpC2 light blue, ArpC3 violet, ArpC4 dark blue and ArpC5 yellow. Actin is shown in grey. The models were aligned on the ArpC2 subunits to visualize the different conformations of the Arp2/3 complex and in case for the branch junction also the varying position on the mother filament between the *in situ* and *in vitro* model. **(b-c)** RMSD values (in Å) calculated between the subunits of the three models shown in **(a)**. Rows indicate which subunit was used for aligning full models to each other, prior to measurements between individual subunits (indicated in the columns) of the different models of the active Arp2/3 complex. **(b)** RMSD values of differences between the Arp2/3 complex in branch junctions in cells and the *in vitro* Dip1-activated Arp2/3 complex. In order to calculate C-alpha RMSD values between our model and pdb 6W17 only primary structure areas are considered, in which the *B. Taurus* (as used in our model) and *S. pombe* protein sequences are in the same register, hence omitting inserts present in only one species. This comparison reveals differences between the Dip1-activated Arp2/3 complex *in vitro* and the activated state of the Arp2/3 complex in cells, in particular with respect to ArpC3. **(c)** RMSD values of differences between the Arp2/3 complex in branch junctions in cells and the MD-derived *in vitro* branch junction model.

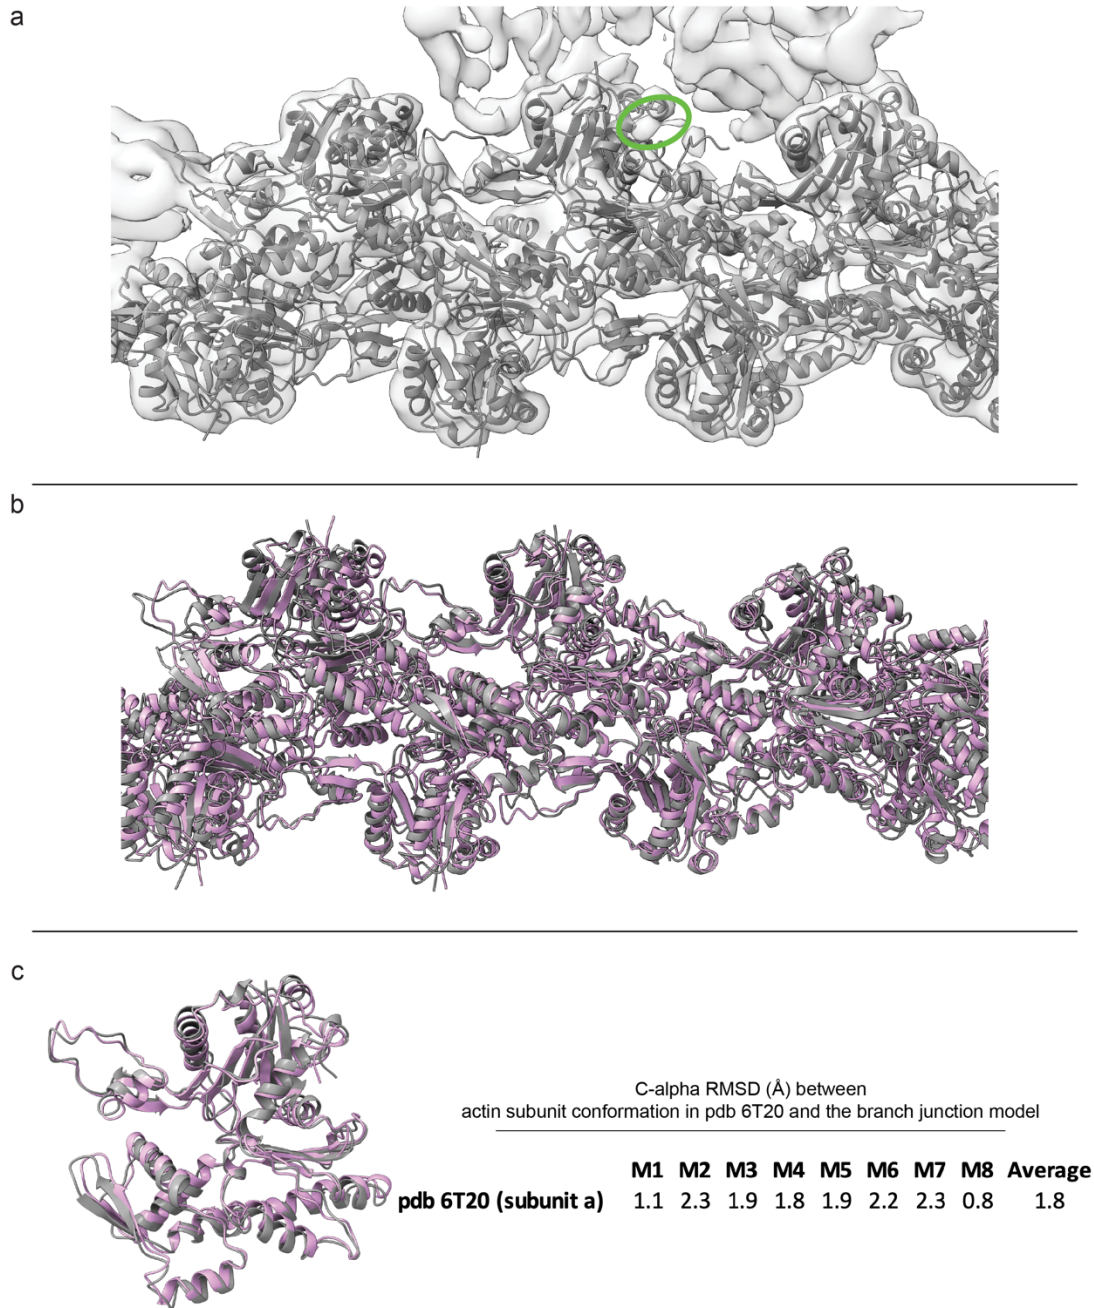

**Supplementary Fig. 6.: Mother actin filament conformation in the actin-Arp2/3 complex branch junction. (a)** Fit of the final model of the mother actin filament after MD-refinement into the EM density of the branch junction using ISOLDE<sup>6</sup>. The empty density close to M4, corresponding to the helix of ArpC1 is annotated with a green ellipsoid. **(b)** Superimposition between the starting model used for fitting (pdb 6T20, pink) and the final model after MD-refinement. Small deviations between the filament assemblies can be observed. **(c)** Superimposition between one actin subunit of pdb 6T20 (pink) and subunit M4 of the mother filament in our branch junction model. No large-scale deviations in the subunit conformation are observed. **(d)** RMSD calculations between the C-alpha atoms of one subunit of pdb 6T20 and the subunits of the mother filament. The average RMSD value is 1.8Å.



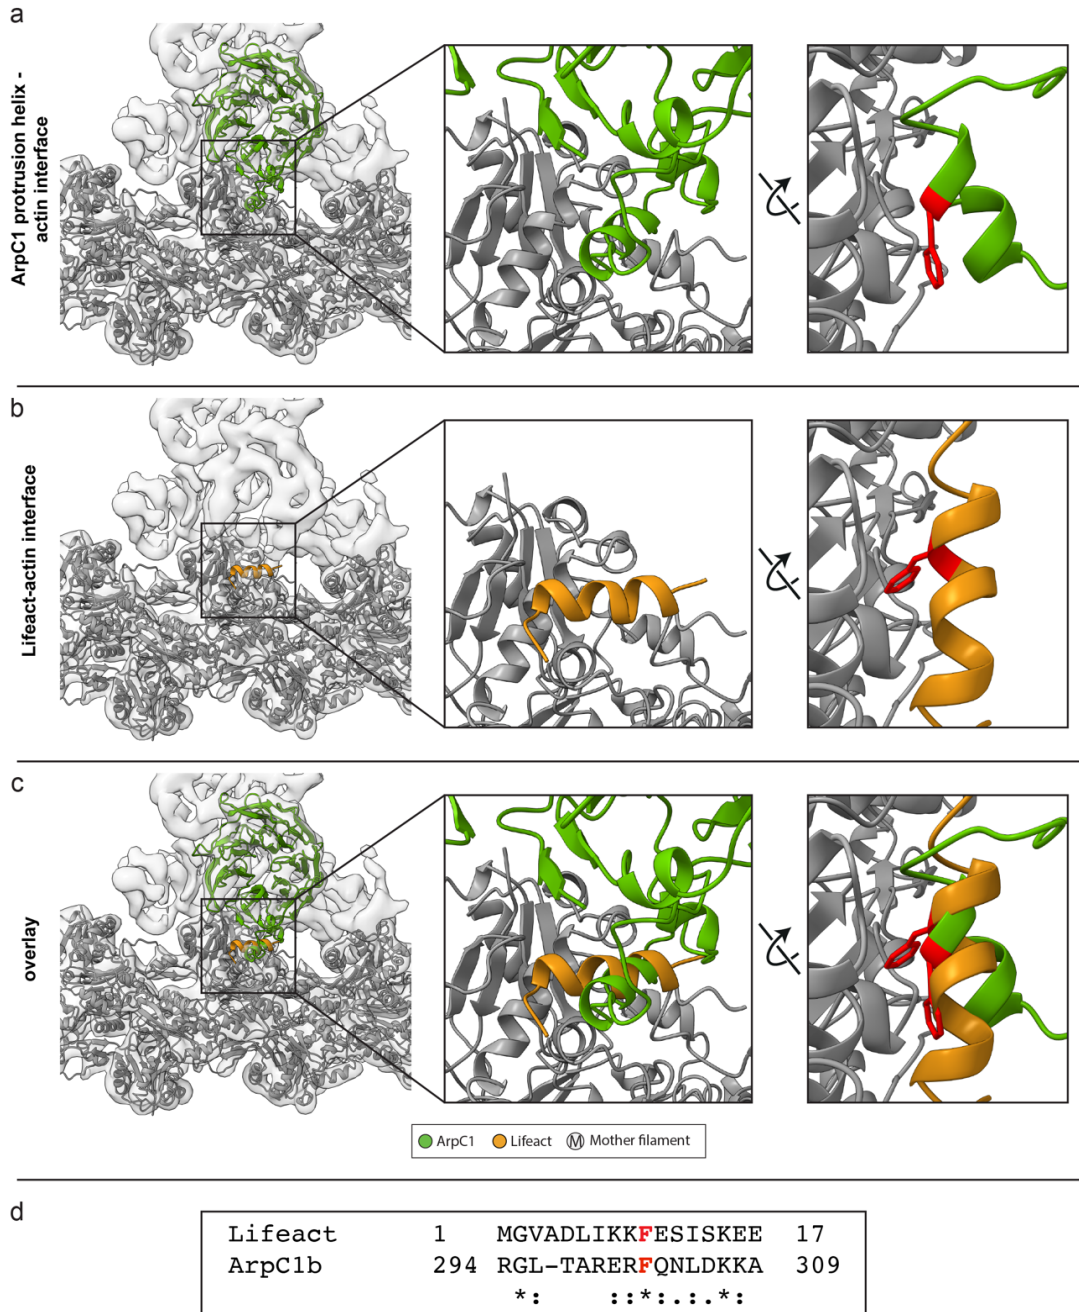

**Supplementary Fig. 7.: The ArpC1 protrusion helix and Lifect share the same actin filament binding site**

**(a-c)** Overview of the ArpC1 protrusion helix-actin and Lifect-actin interface and a direct overlay of both for comparison (left). The middle panel shows magnified views of the interface. The right panel additionally shows a rotated view of the middle panel where Phe302 in ArpC1 and Phe10 in Lifect, which can participate in the hydrophobic interface, are highlighted. ArpC1 is colored green, actin in grey and Lifect is shown in orange. **(d)** Sequence alignment of the ArpC1 helix and Lifect. The same residues as shown in a-c) are highlighted in red. The model of Lifect was derived from pdb 7BTE<sup>7</sup>. An asterisk indicates full conservation.

| <b>Sample</b>               | <b>NIH-3T3 fibroblast lamellipodia</b>      |                             |
|-----------------------------|---------------------------------------------|-----------------------------|
| <b>Acquisition settings</b> | <b>Microscope</b>                           | FEI Titan Krios             |
|                             | <b>Voltage (keV)</b>                        | 300                         |
|                             | <b>Detector</b>                             | Gatan BioQuantum K3         |
|                             | <b>Energy-filter</b>                        | Yes                         |
|                             | <b>Slit width (eV)</b>                      | 20                          |
|                             | <b>Super-resolution mode</b>                | Yes                         |
|                             | <b>Å/pixel</b>                              | 2.137                       |
|                             | <b>Defocus range (microns)</b>              | -1.75 to -5.5               |
|                             | <b>Defocus step (microns)</b>               | 0.25 to 0.5                 |
|                             | <b>Acquisition scheme</b>                   | -60/60°, 2°, dose-symmetric |
|                             | <b>Total Dose (electrons/Å<sup>2</sup>)</b> | ~170                        |
|                             | <b>Dose rate (electrons/pix/sec)</b>        | 19.25                       |
|                             | <b>Frame number</b>                         | 7                           |
|                             | <b>Tomogram number</b>                      | 131                         |
| <b>Processing settings</b>  | <b>Subvolumes after template matching</b>   | 39,300                      |
|                             | <b>Subvolumes final</b>                     | 14,296                      |
|                             | <b>Final resolution (0.143 FSC) in Å</b>    | <b>9</b>                    |

**Table S1.**  
Data acquisition and image processing parameters

| Subunit | pdb 1TYQ              | residues added with coot | residues added from other source (source) | residues cropped compared to 1TYQ | residue stubs completed for side chains for modeling in ISOLDE                                                                                        |
|---------|-----------------------|--------------------------|-------------------------------------------|-----------------------------------|-------------------------------------------------------------------------------------------------------------------------------------------------------|
| Arp2    | 151-345               | 1, 2, 3                  | 4-150, 346-387 (4JD2)                     |                                   | 27, 36, 42, 53, 106, 118, 125, 153, 173, 174, 175, 180, 181, 290, 291, 292, 294, 295, 296, 329, 330, 331, 336, 339, 340, 341, 345, 366, 380, 383, 384 |
| Arp3    | 2-39, 52-353, 360-418 | 1, 40-51, 354-359        |                                           |                                   | 79, 262, 263, 264, 265                                                                                                                                |
| ArpC1   | 1-288, 319-372        | 289-296, 310-318         | 297-309 (1K8K)                            |                                   | 1, 130, 131                                                                                                                                           |
| ArpC2   | 1-208, 217-281        | 209-216                  |                                           | 282                               | 207                                                                                                                                                   |
| ArpC3   | 2-150, 155-174        | 1, 151-154, 175-178      |                                           |                                   |                                                                                                                                                       |
| ArpC4   | 3-168                 | 1, 2                     |                                           |                                   |                                                                                                                                                       |
| ArpC5   | 36-151                |                          |                                           | 10-27, 35                         | 74                                                                                                                                                    |

**Table S2.**

**Summary of model content**

The pdb files used to generate the final model of the active Arp2/3 complex are listed. Residues that had to be added or removed from the original models are indicated. Residue stubs in the original models were completed to contain their entire side chains for MD-modelling in ISOLDE.

| <b>ISOLDE Refinement</b>                                     | <b>Actin filament Arp2/3 complex<br/>branch junction</b> |
|--------------------------------------------------------------|----------------------------------------------------------|
| <b>Resolution of map (Å)</b>                                 | 9                                                        |
| <b>Number of Arp2/3 complex subunits/<br/>actin monomers</b> | 7/11                                                     |
| <b>All-atom clash score</b>                                  | 3.1                                                      |
| <b>Rotamer outliers</b>                                      | 6.7%                                                     |
| <b>Ramachandran outliers</b>                                 | 2.5%                                                     |
| <b>Ramachandran favoured</b>                                 | 84.2%                                                    |
| <b>Rmsd (angles, degrees)</b>                                | 2.209                                                    |
| <b>Rmsd (bonds, Å)</b>                                       | 0.013                                                    |

**Table S3.**  
**Modelling parameters and statistics**

| Residues contributing to Arp2/3 - actin filament interfaces (cut-off distance: 10Å C-alpha to C-alpha atom) |                                                                                                                                                                                                                                                                                                                                                               |                                                                                                                                 |                                                                                                                                                                                                                                                           |                                                                                                                                                                |                                                                                                                                     |                                          |                                                                                                                                                                                                                                                                                                                                                                                                                 |                                                                                                                                                                                                                                                                                                                                                                                                                                                                                    |                                                                                                                                                                                                                                                                                                                                                                                                                                                                                |                                                                                                            |                                                                                                                                                                                                                                                                                                                                                                                                                                                               |                                                                                                                                                                                                                                                                                                                                                                                                          |                                                                                                                                                                                                                                                                                                                                                                                                                                                                                                                                         |                                                                                                                                                                                         |
|-------------------------------------------------------------------------------------------------------------|---------------------------------------------------------------------------------------------------------------------------------------------------------------------------------------------------------------------------------------------------------------------------------------------------------------------------------------------------------------|---------------------------------------------------------------------------------------------------------------------------------|-----------------------------------------------------------------------------------------------------------------------------------------------------------------------------------------------------------------------------------------------------------|----------------------------------------------------------------------------------------------------------------------------------------------------------------|-------------------------------------------------------------------------------------------------------------------------------------|------------------------------------------|-----------------------------------------------------------------------------------------------------------------------------------------------------------------------------------------------------------------------------------------------------------------------------------------------------------------------------------------------------------------------------------------------------------------|------------------------------------------------------------------------------------------------------------------------------------------------------------------------------------------------------------------------------------------------------------------------------------------------------------------------------------------------------------------------------------------------------------------------------------------------------------------------------------|--------------------------------------------------------------------------------------------------------------------------------------------------------------------------------------------------------------------------------------------------------------------------------------------------------------------------------------------------------------------------------------------------------------------------------------------------------------------------------|------------------------------------------------------------------------------------------------------------|---------------------------------------------------------------------------------------------------------------------------------------------------------------------------------------------------------------------------------------------------------------------------------------------------------------------------------------------------------------------------------------------------------------------------------------------------------------|----------------------------------------------------------------------------------------------------------------------------------------------------------------------------------------------------------------------------------------------------------------------------------------------------------------------------------------------------------------------------------------------------------|-----------------------------------------------------------------------------------------------------------------------------------------------------------------------------------------------------------------------------------------------------------------------------------------------------------------------------------------------------------------------------------------------------------------------------------------------------------------------------------------------------------------------------------------|-----------------------------------------------------------------------------------------------------------------------------------------------------------------------------------------|
| Interface                                                                                                   | Arp2/3 complex - mother filament                                                                                                                                                                                                                                                                                                                              |                                                                                                                                 |                                                                                                                                                                                                                                                           |                                                                                                                                                                |                                                                                                                                     |                                          |                                                                                                                                                                                                                                                                                                                                                                                                                 |                                                                                                                                                                                                                                                                                                                                                                                                                                                                                    |                                                                                                                                                                                                                                                                                                                                                                                                                                                                                |                                                                                                            | Arp2/3 complex - daughter filament                                                                                                                                                                                                                                                                                                                                                                                                                            |                                                                                                                                                                                                                                                                                                                                                                                                          |                                                                                                                                                                                                                                                                                                                                                                                                                                                                                                                                         |                                                                                                                                                                                         |
| Protein                                                                                                     | Arp3                                                                                                                                                                                                                                                                                                                                                          | ArpC1                                                                                                                           | ArpC2                                                                                                                                                                                                                                                     | ArpC3                                                                                                                                                          | ArpC4                                                                                                                               | M2                                       | M4                                                                                                                                                                                                                                                                                                                                                                                                              | M5                                                                                                                                                                                                                                                                                                                                                                                                                                                                                 | M6                                                                                                                                                                                                                                                                                                                                                                                                                                                                             | M7                                                                                                         | Arp2                                                                                                                                                                                                                                                                                                                                                                                                                                                          | Arp3                                                                                                                                                                                                                                                                                                                                                                                                     | D1                                                                                                                                                                                                                                                                                                                                                                                                                                                                                                                                      | D2                                                                                                                                                                                      |
| UniProtKB                                                                                                   | P61157                                                                                                                                                                                                                                                                                                                                                        | Q58CQ2                                                                                                                          | Q3MHR7                                                                                                                                                                                                                                                    | Q3T035                                                                                                                                                         | Q148J6                                                                                                                              | P68135                                   | P68135                                                                                                                                                                                                                                                                                                                                                                                                          | P68135                                                                                                                                                                                                                                                                                                                                                                                                                                                                             | P68135                                                                                                                                                                                                                                                                                                                                                                                                                                                                         | P68135                                                                                                     | A7MB62                                                                                                                                                                                                                                                                                                                                                                                                                                                        | P61157                                                                                                                                                                                                                                                                                                                                                                                                   | P68135                                                                                                                                                                                                                                                                                                                                                                                                                                                                                                                                  | P68135                                                                                                                                                                                  |
| Total # of contact residues                                                                                 | 34                                                                                                                                                                                                                                                                                                                                                            | 11                                                                                                                              | 23                                                                                                                                                                                                                                                        | 7                                                                                                                                                              | 13                                                                                                                                  | 4                                        | 35                                                                                                                                                                                                                                                                                                                                                                                                              | 8                                                                                                                                                                                                                                                                                                                                                                                                                                                                                  | 42                                                                                                                                                                                                                                                                                                                                                                                                                                                                             | 10                                                                                                         | 41                                                                                                                                                                                                                                                                                                                                                                                                                                                            | 36                                                                                                                                                                                                                                                                                                                                                                                                       | 45                                                                                                                                                                                                                                                                                                                                                                                                                                                                                                                                      | 17                                                                                                                                                                                      |
| ResidueID                                                                                                   | Lys 38<br>Glu 39<br>Ser 40<br>Ala 41<br>Lys 42<br>Val 43<br>Gly 44<br>Asp 45<br>Gln 46<br>Ala 47<br>Gln 48<br>Arg 49<br>Arg 50<br>Val 51<br>Glu 68<br>Lys 69<br>Pro 70<br>Thr 71<br>Tyr 72<br>Ala 73<br>Thr 74<br>Tyr 202<br>Gln 205<br>Gln 206<br>Pro 216<br>Pro 217<br>Glu 218<br>Gln 219<br>Ser 220<br>Leu 221<br>Ala 261<br>Ile 262<br>Ser 263<br>Lys 264 | Thr 297<br>Ala 298<br>Arg 299<br>Glu 300<br>Arg 301<br>Phe 302<br>Gln 303<br>Asn 304<br>Leu 305<br>Ala 47<br>Asp 306<br>Lys 307 | Val 176<br>Lys 179<br>Val 180<br>Gln 183<br>Glu 184<br>Glu 187<br>Gly 188<br>Arg 190<br>His 193<br>Thr 194<br>Gln 197<br>Leu 199<br>Glu 204<br>Pro 205<br>Pro 206<br>Leu 207<br>Glu 208<br>Asp 211<br>Thr 212<br>Asp 213<br>Gly 217<br>Asp 218<br>Phe 228 | Lys 93<br>Tyr 96<br>Thr 97<br>Ile 100<br>Pro 176<br>Lys 144<br>Gly 177<br>Gln 178<br>Ser 147<br>Glu 148<br>Lys 150<br>Leu 151<br>Asn 154<br>Ala 155<br>Arg 158 | Met 1<br>Thr 2<br>Ala 3<br>Ile 82<br>Glu 83<br>Lys 144<br>Ser 147<br>Glu 148<br>Lys 150<br>Leu 151<br>Asn 154<br>Ala 155<br>Arg 158 | Ser 350<br>Thr 351<br>Gln 353<br>Gln 354 | Lys 50<br>Lys 84<br>His 87<br>Ser 232<br>Ser 233<br>Tyr 91<br>Ser 234<br>Gln 121<br>Glu 125<br>Leu 142<br>Tyr 143<br>Ala 144<br>Ser 145<br>Gly 146<br>Arg 147<br>Gly 342<br>Ile 345<br>Leu 346<br>Ser 348<br>Leu 346<br>Ser 350<br>Thr 351<br>Phe 352<br>Tyr 362<br>Asp 363<br>Glu 364<br>Ala 365<br>Gly 366<br>Pro 367<br>Ser 368<br>Ile 369<br>Val 370<br>His 371<br>Arg 372<br>Lys 373<br>Cys 374<br>Phe 375 | Met 227<br>Ala 228<br>Ala 231<br>Ser 232<br>Ser 233<br>His 40<br>Gln 41<br>Ser 239<br>Gly 245<br>Val 43<br>Gln 246<br>Val 45<br>Val 247<br>Ile 248<br>Gly 48<br>Lys 50<br>Asp 51<br>Ser 52<br>Ile 64<br>Leu 65<br>Thr 66<br>Leu 67<br>Asp 80<br>Glu 83<br>Lys 84<br>Trp 86<br>His 87<br>Phe 90<br>Tyr 91<br>Asn 92<br>Glu 93<br>Leu 94<br>Arg 95<br>Val 96<br>Ala 97<br>Lys 113<br>Ala 114<br>Glu 117<br>Lys 118<br>Gln 121<br>Glu 125<br>Thr 126<br>Glu 364<br>Ala 365<br>Gly 366 | Gly 36<br>Arg 37<br>Pro 38<br>Ser 232<br>Ser 233<br>His 40<br>Ser 234<br>Gln 41<br>Gly 42<br>Gly 245<br>Val 43<br>Gln 246<br>Val 45<br>Ile 248<br>Gly 48<br>Lys 50<br>Asp 51<br>Ser 52<br>Ile 64<br>Leu 65<br>Thr 66<br>Leu 67<br>Asp 80<br>Glu 83<br>Lys 84<br>Trp 86<br>His 87<br>Phe 90<br>Tyr 91<br>Asn 92<br>Glu 93<br>Leu 94<br>Arg 95<br>Val 96<br>Ala 97<br>Lys 113<br>Ala 114<br>Glu 117<br>Lys 118<br>Gln 121<br>Glu 125<br>Thr 126<br>Glu 364<br>Ala 365<br>Gly 366 | Tyr 198<br>Ala 231<br>Ser 232<br>Ser 233<br>Ser 234<br>Ser 239<br>Gly 245<br>Gln 246<br>Val 247<br>Ile 248 | Glu 75<br>Asn 76<br>Met 114<br>Asn 115<br>Pro 116<br>Thr 117<br>Lys 118<br>Val 143<br>Leu 146<br>Gly 150<br>Leu 151<br>Leu 152<br>Thr 153<br>Val 169<br>Tyr 170<br>Glu 171<br>Gly 172<br>Phe 173<br>Ser 174<br>Leu 175<br>Pro 176<br>His 177<br>Leu 178<br>Thr 179<br>His 269<br>Asn 272<br>Val 273<br>Glu 274<br>Gly 275<br>Gln 287<br>Asp 290<br>Ile 291<br>Asp 292<br>Thr 293<br>Arg 294<br>Ser 295<br>Tyr 325<br>Arg 328<br>Val 329<br>Leu 330<br>Lys 331 | Val 146<br>Leu 149<br>Trp 153<br>Glu 160<br>Arg 161<br>Thr 162<br>Leu 163<br>Thr 164<br>Val 180<br>Ala 181<br>Glu 182<br>Gly 183<br>Tyr 184<br>Val 185<br>Pro 308<br>Ile 309<br>Asp 310<br>Val 311<br>Arg 312<br>Arg 313<br>Leu 347<br>Lys 348<br>Leu 349<br>Ser 350<br>Glu 351<br>Glu 352<br>Leu 353<br>Ser 354<br>Gly 355<br>Arg 357<br>Leu 358<br>Lys 359<br>Pro 360<br>Lys 361<br>Pro 362<br>Ile 363 | Pro 38<br>Arg 39<br>His 40<br>Gln 41<br>Val 43<br>Gly 42<br>Met 44<br>Val 45<br>Met 47<br>Lys 61<br>Gly 63<br>Met 47<br>Ile 64<br>Glu 205<br>Leu 242<br>Pro 243<br>Asp 244<br>Gly 245<br>Gln 246<br>Val 247<br>Leu 65<br>Thr 66<br>Ile 75<br>Asp 187<br>Tyr 188<br>Lys 191<br>Ile 192<br>Leu 193<br>Thr 194<br>Glu 195<br>Arg 196<br>Gly 197<br>Ser 199<br>Phe 200<br>Ser 239<br>Glu 241<br>Leu 242<br>Pro 243<br>Asp 244<br>Gly 245<br>Gln 246<br>Val 247<br>Ile 248<br>Thr 249<br>Ile 250<br>Phe 266<br>Ile 267<br>Gly 268<br>Met 269 | His 40<br>Gln 41<br>Gly 42<br>Val 43<br>Met 44<br>Val 45<br>Met 47<br>Lys 61<br>Gly 63<br>Met 47<br>Ile 64<br>Glu 205<br>Leu 242<br>Pro 243<br>Asp 244<br>Gly 245<br>Gln 246<br>Val 247 |

**Table S4. Arp2/3 complex residues contacting the actin mother and daughter filaments**  
Summary of residues forming interactions between the Arp2/3 complex and the actin filaments, defined by a 10Å C-alpha to C-alpha distance cutoff. The UniProt identifiers for the individual proteins are given.

## References:

1. Shaaban, M., Chowdhury, S. & Nolen, B. J. Cryo-EM reveals the transition of Arp2/3 complex from inactive to nucleation-competent state. *Nat. Struct. Mol. Biol.* (2020).
2. Pospich, S., Merino, F. & Raunser, S. Structural Effects and Functional Implications of Phalloidin and Jasplakinolide Binding to Actin Filaments. *Structure* **28**, 437-449.e5 (2020).
3. Nolen, B. J., Littlefield, R. S. & Pollard, T. D. Crystal structures of actin-related protein 2/3 complex with bound ATP or ADP. *Proc. Natl. Acad. Sci. U. S. A.* **101**, 15627–15632 (2004).
4. Pfaendtner, J. *et al.* Key Structural Features of the Actin Filament Arp2/3 Complex Branch Junction Revealed by Molecular Simulation. *J. Mol. Biol.* **416**, 148–161 (2012).
5. Rouiller, I. *et al.* The structural basis of actin filament branching by the Arp2/3 complex. *J. Cell Biol.* **180**, 887–895 (2008).
6. Croll, T. I. ISOLDE: a physically realistic environment for model building into low-resolution electron-density maps. *Acta Crystallogr. Sect. D* **74**, 519–530 (2018).
7. Kumari, A., Kesarwani, S., Javoor, M. G., Vinothkumar, K. R. & Sirajuddin, M. Structural insights into actin filament recognition by commonly used cellular actin markers. *EMBO J.* **39**, e104006 (2020).
